# Supplementary material for: An experimental evaluation of the benefits and costs of providing fertility information to adolescents and emerging adults
Source: PubMed Central journal article supplement — Hum Reprod. 2018 May 17;33(7):1247–53. doi: 10.1093/humrep/dey107 (PMC6012744; doi:10.1093/humrep/dey107), 2018-05-17
Supplement: dey107suppl_table1.pdf [file dey107suppl_table1.pdf]

**Supplementary Table S1 Means (standard deviations) for psychological and fertility variables at baseline for the total sample and according to age and experimental group.**

|                               | Total sample<br>N = 208 | Total adolescents<br>n = 93 | Total emerging adults<br>n = 115 | Effect size<br>$\eta p^2$ | Adolescents         |                   | Effect size<br>$\eta p^2$ | Emerging adults     |                   | Effect size<br>$\eta p^2$ |
|-------------------------------|-------------------------|-----------------------------|----------------------------------|---------------------------|---------------------|-------------------|---------------------------|---------------------|-------------------|---------------------------|
|                               |                         |                             |                                  |                           | FertiEduc<br>n = 46 | Control<br>N = 46 |                           | FertiEduc<br>N = 60 | Control<br>n = 55 |                           |
| Fertility knowledge           | 54.4 (18.90)            | 47.1 (19.26)                | 60.3 (16.45)                     | 0.10***                   | 44.6 (19.11)        | 49.5 (19.30)      | 0.01                      | 60.4 (16.51)        | 60.1 (16.54)      | 0.00                      |
| Infertility threat            | 6.9 (4.09)              | 5.5 (3.92)                  | 7.9 (3.92)                       | 0.08***                   | 4.7 (2.47)          | 6.3 (4.91)        | 0.02                      | 7.6 (4.08)          | 8.2 (3.75)        | 0.01                      |
| Anxiety                       | 35.7 (11.44)            | 36.4 (11.26)                | 35.2 (11.60)                     | 0.00                      | 37.5 (12.19)        | 35.3 (10.27)      | 0.01                      | 35.1 (11.78)        | 35.3 (11.50)      | 0.00                      |
| Physical stress               | 11.0 (2.69)             | 11.1 (2.90)                 | 10.9 (2.52)                      | 0.00                      | 11.6 (2.90)         | 10.7 (2.84)       | 0.02                      | 10.8 (2.23)         | 11.0 (2.82)       | 0.00                      |
| Optimism                      | 19.8 (4.51)             | 18.2 (4.04)                 | 21.1 (4.46)                      | 0.10***                   | 17.9 (3.75)         | 18.5 (4.32)       | 0.01                      | 21.9 (4.37)         | 20.3 (4.45)       | 0.03                      |
| Health literacy               | 32.0 (6.20)             | 33.2 (6.47)                 | 31.1 (5.84)                      | 0.03*                     | 33.1 (7.52)         | 33.3 (5.35)       | 0.00                      | 31.8 (6.00)         | 30.4 (5.63)       | 0.01                      |
| Fertility relevance           | 5.4 (1.54)              | 5.0 (1.55)                  | 5.8 (1.44)                       | 0.04**                    | 4.7 (1.44)          | 5.3 (1.61)        | 0.00                      | 6.0 (1.45)          | 5.5 (1.39)        | 0.03                      |
| Optimality of fertility plans |                         |                             |                                  |                           |                     |                   |                           |                     |                   |                           |
| First birth                   | 3.3 (4.68)              | 5.5 (5.26)                  | 1.7 (3.37)                       | 0.18***                   | 5.5 (5.34)          | 5.5 (5.23)        | 0.00                      | 1.8 (3.31)          | 1.6 (3.45)        | 0.00                      |
| Last birth                    | 2.3 (4.62)              | 4.4 (4.97)                  | 0.8 (3.67)                       | 0.16***                   | 4.1 (4.59)          | 4.7 (5.37)        | 0.00                      | 1.0 (3.31)          | 0.7 (4.04)        | 0.00                      |

Means (standard deviations) for psychological and fertility variables at baseline for the total sample and according to age and experimental group.

Note: N = Sample size, MANOVA for significance testing between age groups and information groups.  $\eta p^2$  = partial eta statistic for effect size for age group effects at baseline. FertiEduc = fertility education group. \* $P \leq 0.05$ , \*\* $P \leq 0.01$ , \*\*\* $P \leq 0.001$ .
