# Supplementary material for: An experimental evaluation of the benefits and costs of providing fertility information to adolescents and emerging adults
Source: PubMed Central journal article supplement — Hum Reprod. 2018 May 17;33(7):1247–53. doi: 10.1093/humrep/dey107 (PMC6012744; doi:10.1093/humrep/dey107), 2018-05-17
Supplement: dey107suppl_table2.pdf [file dey107suppl_table2.pdf]

**Supplementary Table SII F-ratios for ANOVAs evaluating the effects of fertility information on fertility knowledge, infertility threat, anxiety, physical stress and optimality of fertility plans.**

| Study variable <sup>1</sup>   | Main effects |      |          | 2-way interactions |           |           | 3-way interaction |
|-------------------------------|--------------|------|----------|--------------------|-----------|-----------|-------------------|
|                               | AG           | IG   | Time     | AG × IG            | AG × Time | IG × Time | AG × IG × Time    |
| Fertility knowledge           | 54.03***     | 2.11 | 45.15*** | 3.51               | 18.77***  | 19.72***  | 4.85*             |
| Infertility threat            | 21.51***     | 1.08 | 1.59     | 0.01               | 0.01      | 4.65*     | 3.31              |
| Anxiety                       | 1.81         | 0.10 | 4.57*    | 0.01               | 2.11      | 0.58      | 3.56              |
| Physical stress               | 0.65         | 0.90 | 26.76*** | 2.70               | 0.07      | 0.39      | 0.27              |
| Optimality of fertility plans |              |      |          |                    |           |           |                   |
| First birth                   | 42.87***     | 0.00 | 0.02     | 0.44               | 0.52      | 1.42      | 0.15              |
| Last birth                    | 30.76***     | 0.09 | 0.50     | 0.19               | 1.55      | 0.08      | 0.56              |

Note: AG = age group (adolescents, emerging adults), IG = informational group (fertility education, control), x = indicates interaction term between variables, ANOVA = analysis of variance. \*\*\* $P \leq 0.001$ , \*\* $P \leq 0.01$ , \* $P \leq 0.05$ . <sup>1</sup>N varies per variable due to random missing data (Fertility knowledge,  $n = 199$ ; Infertility threat,  $n = 198$ ; Anxiety  $n = 206$ ; physical stress  $n = 207$ ; optimality of fertility plans, first birth  $n = 194$ , Last birth,  $n = 194$ ).
