# Supplementary material for: An experimental evaluation of the benefits and costs of providing fertility information to adolescents and emerging adults
Source: PubMed Central journal article supplement — Hum Reprod. 2018 May 17;33(7):1247–53. doi: 10.1093/humrep/dey107 (PMC6012744; doi:10.1093/humrep/dey107), 2018-05-17
Supplement: dey107suppl_table3.pdf [file dey107suppl_table3.pdf]

**Supplementary Table SIII Means (standard deviations) for psychological and fertility-related variables according to age group, experimental group and study time point.**

|                               | Adolescents    |              |                    |              |                  |              | Emerging adults (n = 115) |              |                    |              |                  |              |
|-------------------------------|----------------|--------------|--------------------|--------------|------------------|--------------|---------------------------|--------------|--------------------|--------------|------------------|--------------|
|                               | Total (n = 93) |              | FertiEduc (n = 46) |              | Control (n = 47) |              | Total (n = 115)           |              | FertiEduc (n = 60) |              | Control (n = 55) |              |
|                               | T1             | T2           | T1                 | T2           | T1               | T2           | T1                        | T2           | T1                 | T2           | T1               | T2           |
| Fertility knowledge           | 47.1 (19.26)   | 49.9 (23.80) | 44.6 (19.11)       | 50.6 (25.73) | 49.5 (19.30)     | 49.2 (22.09) | 60.3 (16.45)              | 72.8 (17.65) | 60.4 (16.51)       | 80.3 (14.00) | 60.1 (16.54)     | 64.9 (17.74) |
| Infertility threat            | 5.5 (3.92)     | 5.8 (4.29)   | 4.7 (2.47)         | 6.0 (4.56)   | 6.3 (4.91)       | 5.7 (4.06)   | 7.9 (3.92)                | 8.3 (4.06)   | 7.6 (4.08)         | 8.1 (4.16)   | 8.2 (3.75)       | 8.5 (3.98)   |
| Anxiety                       | 36.4 (11.26)   | 38.5 (12.79) | 37.5 (12.19)       | 38.0 (13.44) | 35.3 (10.27)     | 39.1 (12.26) | 35.2 (11.60)              | 35.6 (10.39) | 35.1 (11.78)       | 36.1 (11.29) | 35.3 (11.50)     | 35.1 (9.40)  |
| Physical stress               | 11.1 (2.90)    | 10.5 (2.87)  | 11.6 (2.90)        | 10.9 (3.06)  | 10.7 (2.85)      | 10.1 (2.65)  | 10.9 (2.52)               | 10.3 (2.14)  | 10.8 (2.23)        | 10.1 (2.00)  | 11.0 (2.82)      | 10.4 (2.29)  |
| Optimism                      | 18.2 (4.04)    |              | 17.9 (3.75)        |              | 18.5 (4.32)      |              | 21.1 (4.46)               |              | 21.9 (4.37)        |              | 20.3 (4.45)      |              |
| Health literacy               | 33.2 (6.47)    |              | 33.1 (7.52)        |              | 33.3 (5.35)      |              | 31.1 (5.84)               |              | 31.8 (6.00)        |              | 30.4 (5.63)      |              |
| Fertility relevance           | 5.0 (1.55)     |              | 4.7 (1.44)         |              | 5.3 (1.61)       |              | 5.8 (1.44)                |              | 6.0 (1.45)         |              | 5.5 (1.39)       |              |
| Optimality of Fertility Plans |                |              |                    |              |                  |              |                           |              |                    |              |                  |              |
| First birth                   | 5.5 (5.26)     | 5.9 (5.12)   | 5.5 (5.35)         | 5.7 (5.11)   | 5.5 (5.23)       | 6.1 (5.19)   | 1.7 (3.37)                | 1.9 (3.47)   | 1.8 (3.31)         | 1.9 (3.62)   | 1.6 (4.45)       | 1.8 (3.34)   |
| Last birth                    | 4.4 (4.97)     | 4.4 (5.36)   | 4.1 (4.59)         | 4.2 (5.59)   | 4.7 (5.37)       | 4.6 (5.20)   | 0.8 (3.67)                | 0.9 (3.70)   | 1.0 (3.31)         | 0.9 (3.47)   | 0.7 (4.04)       | 0.8 (3.96)   |

Note: N = sample size. T1 = Time 1, T2 = Time 2. FertiEduc = fertility education information.
