# Supplementary material for: An experimental evaluation of the benefits and costs of providing fertility information to adolescents and emerging adults
Source: PubMed Central journal article supplement — Hum Reprod. 2018 May 17;33(7):1247–53. doi: 10.1093/humrep/dey107 (PMC6012744; doi:10.1093/humrep/dey107), 2018-05-17
Supplement: dey107suppl_table4.pdf [file dey107suppl_table4.pdf]

**Supplementary Table SIV Illustrative quotes of the feedback given and how it was categorised according to age group.**

|                 | <b>Adolescents</b>                                                                                                                                                                            | <b>Emerging adults</b>                                                                                                                                                                                                                                                                                 |
|-----------------|-----------------------------------------------------------------------------------------------------------------------------------------------------------------------------------------------|--------------------------------------------------------------------------------------------------------------------------------------------------------------------------------------------------------------------------------------------------------------------------------------------------------|
| <b>Negative</b> | I felt like some of the information was quite obvious.<br>(Female, Control)                                                                                                                   | I felt like it was a bit wordy. It would have been better to draw out the key points and make them into paragraphs or maybe even use diagrams instead. I got a bit bored reading all the information. (Female, Control)                                                                                |
|                 | Very uncomfortable.<br>(Male, FertiEduc)                                                                                                                                                      | It is a stressful thing to read, normally I don't think about my fertility.<br>(Female, FertiEduc)                                                                                                                                                                                                     |
|                 | The information made me a little uneasy.<br>(Female, FertiEduc)                                                                                                                               | Worrying how female fertility decreases at quite a young age. I would definitely not be ready to start having children at 23 (in 2 yrs time).<br>(Female, FertiEduc)                                                                                                                                   |
| <b>Mixed</b>    | Able to inform people, but perhaps too text heavy for some.<br>(Male, Control)                                                                                                                | Quite daunting about how much your fertility decreases as you get older.<br>(Female, FertiEduc)                                                                                                                                                                                                        |
|                 | It was informative, but people may not take the time to read it if they are not told to as it was not particularly grabbing/ we are told these things many times in media.<br>(Male, Control) | Very informative, not so relevant for myself.<br>(Male, Control)                                                                                                                                                                                                                                       |
|                 | Quite helpful and informative, but not something I necessarily feel I need to learn about at the moment.<br>(Male, FertiEduc)                                                                 | Too much pink and too passive in tone. Useful bullet points and good info about potential harm to baby.<br>(Male, Control)                                                                                                                                                                             |
| <b>Neutral</b>  | Useful and well explained however there was too much of it to take on at once. (Female, FertiEduc)                                                                                            | Clear. Understandable. Informative without being accusatory. Possibly too much text to get the point across. (Male, Control)                                                                                                                                                                           |
|                 | It is awful that a child is at so much risk even if there is someone smoking who is not their parent.<br>(Female, Control)                                                                    | Lots of information to read (this may be due to the computer screen as I find it easier reading from paper useful) – plain terminology and easy to understand; (it) didn't seem to flow, seemed to just be random facts which may not apply to everyone so could lose interest.<br>(Female, FertiEduc) |
|                 | Average.<br>(Male, FertiEduc)                                                                                                                                                                 | There are lots of options for infertile couples to be able to have children. (Female, FertiEduc)                                                                                                                                                                                                       |
| <b>Positive</b> | A lot to take in.<br>(Female, FertiEduc)                                                                                                                                                      | Thought provoking. Important to read as some people may not know the effects.<br>(Female, Control)                                                                                                                                                                                                     |
|                 | I feel the information was well presented and was very informative.<br>(Female, Control)                                                                                                      | It was helpful. Good to start thinking how life choices could affect me in later life. (Male, Control)                                                                                                                                                                                                 |
|                 | I think it was helpful to gather this information so then you know all about it.<br>(Female, Control)                                                                                         | All good information.<br>(Male, FertiEduc)                                                                                                                                                                                                                                                             |
|                 | It was enlightening to learn about fertility and it makes me want to be more aware of my own fertility.<br>(Female, FertiEduc)                                                                | Clear, precise very educational.<br>(Male, FertiEduc)                                                                                                                                                                                                                                                  |
|                 | It was presented well and easy to read.<br>(Male, FertiEduc)                                                                                                                                  | Good to know. Helpful. (Female, FertiEduc)                                                                                                                                                                                                                                                             |
|                 | It was informative.<br>(Female, FertiEduc)                                                                                                                                                    | I feel more informed about fertility and when to think about trying to have a child. (Female, FertiEduc)                                                                                                                                                                                               |
|                 | Very well presented. Different boxes with key information and colours were helpful. (Female, FertiEduc)                                                                                       | Visual graphics very helpful. Informative and easy to understand.<br>(Male, FertiEduc)                                                                                                                                                                                                                 |
|                 | Very thorough and informative.<br>(Male, FertiEduc)                                                                                                                                           | Lots of information, like the diagrams makes it easy to see. Lots of text, definitions were helpful as well.(Male, FertiEduc)                                                                                                                                                                          |
|                 | I didn't know about a lot of the information on there. It was well presented and easy to follow and looked good. (Female, FertiEduc)                                                          |                                                                                                                                                                                                                                                                                                        |

Note: FertiEduc = Fertility education information.
